# Supplementary material
Source: publisher figshare collection journal article supplement (https://plos.figshare.com/articles/dataset/_/954597)
Supplement: Supplementary file 1 [file 1 › Figure_S1.pdf]

|       |            |            |            |            |            |             |            |            |            |            |            |            |
|-------|------------|------------|------------|------------|------------|-------------|------------|------------|------------|------------|------------|------------|
|       | 1          | 11         | 21         | 31         | 41         | 51          | 61         | 71         | 81         | 91         | 101        | 111        |
| C57BL | MNFPRALAGF | SSWLFKPELA | EDSPDNDSPD | NDTVNFWREL | LQKINVADLP | DSSFSSSGKEL | NDSVYHTFEH | FKKIRDYDAV | GELLALFLDK | VTKERDQFRD | EISQLRMHIN | DLKASKCVLG |
| AKR   |            |            |            |            |            |             |            |            |            |            |            |            |
| DBA   |            |            |            |            |            |             |            |            |            |            |            |            |
| 129   |            |            |            |            |            |             |            |            |            |            |            |            |
| LG/J  |            |            |            |            |            |             |            |            |            |            |            |            |
| MOL   |            |            |            |            |            |             |            |            |            |            |            |            |
| BAC   |            |            |            |            |            |             |            |            |            |            |            |            |
| CAS1  |            |            |            |            |            |             |            |            |            |            |            |            |
| CAS2  |            |            | .L.        |            |            |             |            |            |            |            |            |            |
| SPR1  |            |            |            | .S.        |            |             | .D.        |            |            |            |            |            |
| SPR2  |            |            |            | .S.        |            |             | .D.        |            |            |            |            |            |
| MAC1  |            |            |            | .S.        |            | .N.         | .D.        |            |            |            |            |            |
| SPI1  |            |            |            | .S.        |            |             | .G.        |            |            |            |            |            |
| CAR1  |            |            |            | EN         |            | .V          | .D.        |            |            |            |            |            |
| CAR2  |            |            | .T.        | EN         | .R.        |             | .V.        | .D.        |            |            |            |            |
| CER   |            |            |            | ENP.       |            |             | .D.        |            |            |            | .L.        |            |
| DUN   |            |            | .K.        | EN         |            | .L          |            | .GQL       | ASCFWH.WI. | *          |            |            |
| COO   |            |            |            | EN         |            |             | .D.        |            |            |            |            |            |
| FAM   |            |            |            | EN         |            |             | .D.        |            |            |            |            |            |
| MIN   |            |            | .S.        | EN         | .A.        | .K.         | .D.        | .N.        |            |            |            |            |
| PLA   | .L.        | .D.        | .G.        | EN         | .SA.       |             | .CD.       |            |            |            | .V.        |            |

|       |            |            |            |            |            |            |            |            |            |            |            |            |
|-------|------------|------------|------------|------------|------------|------------|------------|------------|------------|------------|------------|------------|
|       | 121        | 131        | 141        | 151        | 161        | 171        | 181        | 191        | 201        | 211        | 221        | 231        |
| C57BL | ETLLSYRHRI | EVGEKQTEAL | IVRLADVQSQ | VMCQPARKVS | ADKVRALIGK | EWDPVTWDGD | VWEDIDSEGS | EEAELPTVLA | SPSLSEESGY | ALSKERTQQD | KADAPQIQSS | TSLVTSEPVT |
| AKR   |            |            |            |            |            |            |            |            |            |            |            |            |
| DBA   |            |            |            |            |            |            |            |            |            |            |            |            |
| 129   |            |            |            |            |            |            |            |            |            |            |            |            |
| LG/J  |            |            |            |            |            |            |            |            |            |            |            |            |
| MOL   |            |            |            |            |            |            |            |            |            |            |            |            |
| BAC   |            |            |            |            |            |            |            |            |            | .F.        |            |            |
| CAS1  |            |            |            |            |            |            |            |            |            | .F.        |            |            |
| CAS2  | .F.        |            |            | .R         |            |            |            |            |            | .L.        |            |            |
| SPR1  |            | .K.        |            |            |            |            | .T         |            |            | .L.        |            |            |
| SPR2  |            | .K.        |            |            |            |            | .T         |            |            | .L.        |            |            |
| MAC   |            |            |            |            |            |            |            |            |            |            |            |            |
| SPI   |            |            |            |            |            |            | .T         |            |            |            |            |            |
| CAR1  |            |            |            |            |            |            | .T         |            |            |            |            |            |
| CAR2  |            |            | .L.        |            |            |            | .D.T       | .ALLPTVLA. |            | .A.        | .N.        |            |
| CER   |            |            | .L.        |            |            |            | .D.T       | .I.        |            | .A.        | .N.        |            |
| DUN   |            |            |            |            |            |            | .D.T       |            |            |            | .VS.N.     |            |
| COO   |            |            | .L.        | .Q.        |            |            | .D.T       |            |            | .I*        |            |            |
| FAM   |            |            | .L.        |            |            | .D.        | .D.T       |            |            | .S.        | .K.        |            |
| MIN   |            |            | .L.        | .T.        |            |            | .D.T       | .K.        | .DS.       | .P.        | .EV.N.     |            |
| PLA   |            |            | .L.        | IT.        | .F         |            | .D.        | .K.        | .AS.       |            | .VR.N.     | .A.        |

|       |            |            |            |            |            |            |            |            |             |            |             |            |
|-------|------------|------------|------------|------------|------------|------------|------------|------------|-------------|------------|-------------|------------|
|       | 241        | 251        | 261        | 271        | 281        | 291        | 301        | 311        | 321         | 331        | 341         | 351        |
| C57BL | RPKSLSDLTS | QKHRHTNHEL | NSLAHSNRQK | AKEHARKWIL | RVWDNGGRLT | ILDQIEFLSL | GPLSLDSEFN | VIARTVEDNG | VKSFLFDWLAE | ANVQRWPTRR | ELQSPDITLEW | YSIEDGIERL |
| AKR   |            |            |            |            |            |            |            |            |             |            |             | .K.        |
| DBA   |            |            |            | .Q         |            |            |            |            |             |            |             | .K.        |
| 129   |            |            |            |            |            |            |            |            |             |            | .F.         | .K.        |
| LG/J  |            |            | .Q         |            |            |            |            |            |             |            | .F.         | .K.        |
| MOL   |            |            |            |            |            |            |            |            |             |            | .P.         | .K.        |
| BAC   |            |            |            |            |            |            |            |            |             |            |             | .K.        |
| CAS1  |            |            |            |            |            |            |            |            |             |            |             | .K.        |
| CAS2  |            |            |            | .Q         |            |            |            |            |             |            |             | .K.        |
| SPR1  |            |            | .K.        | .Q.        | .C.Q.      |            |            |            |             | .P.        | .T.         | .K.        |
| SPR2  |            |            | .K.        | .Q.        | .C.Q.      |            |            |            |             | .P.        | .T.         | .K.        |
| MAC   |            |            | .K.        | .Q.        | .Q.        |            | .N.        |            |             |            | .T.         | .K.        |
| SPI   |            | .G.        | .K.        | .Q.        | .Q.        |            | .N.        |            |             |            | .T.         | .K.        |
| CAR1  | .G.I.      |            | .K.        | .Q.        | .Y.        |            | .T.        | .A.        |             | .TTTR.     | .T.         | .A.K.      |
| CAR2  |            |            | .K.        | .Q.        | .H.Q.      |            | .T.        |            |             |            | .T.         | .A.        |
| CER   |            |            | .Y.        | .Q.        | .Q.        | .E.        | .T.        | .A.        |             |            | .M.         | .A.        |
| DUN   |            |            |            |            |            |            |            |            |             |            |             | .K.        |
| COO   |            |            |            |            |            |            |            |            |             |            |             | .K.        |
| FAM   |            | .K.        | .D.        | .L.        | .Q         |            |            |            |             |            | .T.         |            |
| MIN   | .C.        | .DQ.       | .K.        | .Q.        | .C.N       | .G.R.G.    |            | .E.        |             |            | .T.         | FYV.       |
| PLA   |            | .Q.        | .QA.       | .R         | .R.T.      |            | .N.T.      | .E.        |             |            | .T.         | .V.        |

|       |            |            |            |            |            |            |            |            |            |                       |
|-------|------------|------------|------------|------------|------------|------------|------------|------------|------------|-----------------------|
|       | 361        | 371        | 381        | 391        | 401        | 411        | 421        | 431        | 441        |                       |
| C57BL | RELGMIEWLC | VKATCPQWRG | PEDVPITRAM | RITFVRETRE | TWKSFVFSLL | CIKDITVGSV | AAQLHDLIEL | SLKPTAAGLT | SVGSVGVLSL | SPWKHQSNS*            |
| AKR   |            |            |            | .V.        |            |            |            | .TKL       | *          |                       |
| DBA   |            |            |            | .V.        |            |            |            | .TKL       | *          |                       |
| 129   |            |            |            | .V.        |            |            |            | .TKL       | *          |                       |
| LG/J  |            |            |            | .V.        |            |            |            | .TKL       | *          |                       |
| MOL   |            |            |            |            |            |            |            |            |            | *                     |
| BAC   |            |            |            | .V.        |            |            |            |            |            | *                     |
| CAS1  |            |            |            | .V.        |            |            |            |            |            | *                     |
| CAS2  |            | .S.        |            | .V.        |            |            |            |            | AGLASVGSVG | VLSLSPWKHQ SNS*       |
| SPR1  | .I.        |            |            | .V.        |            |            |            | .A         |            |                       |
| SPR2  | .I.        |            |            | .V.        |            |            |            | .P         |            |                       |
| MAC   |            |            | .A.        | .G.        | .N.        |            |            |            | AGLASVGSVG | VLSLSPWKH*            |
| SPI   |            |            | .A.        |            |            |            |            |            | AGLASVGSVG | VLSLSPWKH*            |
| CAR1  |            |            | .A.        | .Q.        |            | .G.        |            |            | AGLASVGSVG | VLSLSPWKH*            |
| CAR2  |            |            | .A.        |            |            | .G.        |            |            | AGSAPVGSVA | PVGSVAVLSL SPWKHQSNS* |
| CER   |            | .S.        | .A.        |            |            |            |            |            | AGSAPVGSVA | VLSLSPWKHQ SNS*       |
| DUN   |            |            |            |            |            |            |            |            | AGLAPVGSVS | VLSLSPWKHQ SNS*       |
| COO   |            |            |            |            |            |            |            |            |            |                       |
| FAM   |            |            |            | .V.        |            |            |            | .A.        | .RG        | GARF*                 |
| MIN   | .P.        | .R.        | .D.A.      | .V.        | .E.        | .S.        | .IM.       | RK.KP.GRGG | ARF*       |                       |
| PLA   |            |            | .A.        | .I.        | .D.        |            |            | .KEASTREED | F*         |                       |

## Figure S1

Comparison of the Fv1 sequence from different mice. Predicted amino acid sequence encoded by the *Fv1* gene from 20 different sources, compared to the *Fv1<sup>b</sup>* allele found in C57BL mice. Source designations are as given in Table 1A. Single letter amino acid code; . = identical to Fv1b; - = deletion; \* = stop.
