# Supplementary material
Source: publisher figshare collection journal article supplement (https://plos.figshare.com/articles/dataset/_/954597)
Supplement: Supplementary file 1 [file 1 › Figure_S2.pdf]

**MOL CAS2 SPR1 SPI**

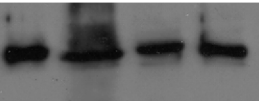

**CAR1 CAR2 CER FAM PLA MIN1 MOCK Fv1<sup>n</sup> Fv1<sup>b</sup>**

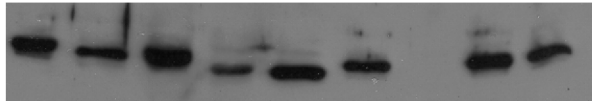

## Figure S2

Western blot analysis of Mus dunni cells transduced with *Fv1s* from wild mice. MDTF cells were transduced with retroviral vectors carrying the *Fv1* gene from wild mice and the EYFP marker such that 50% of the cells were transduced, as determined by flow cytometry. A western blot analysis was performed 3 days post transduction using 25  $\mu$ g of total protein from the cell extracts as previously described (48).
